# Supplementary figures and images for: Deletion of Cbl-b inhibits CD8+ T-cell exhaustion and promotes CAR T-cell function
Source: HighWire-hosted journal article supplement (doi:10.1136/jitc-2020-001688), 2021-01-01

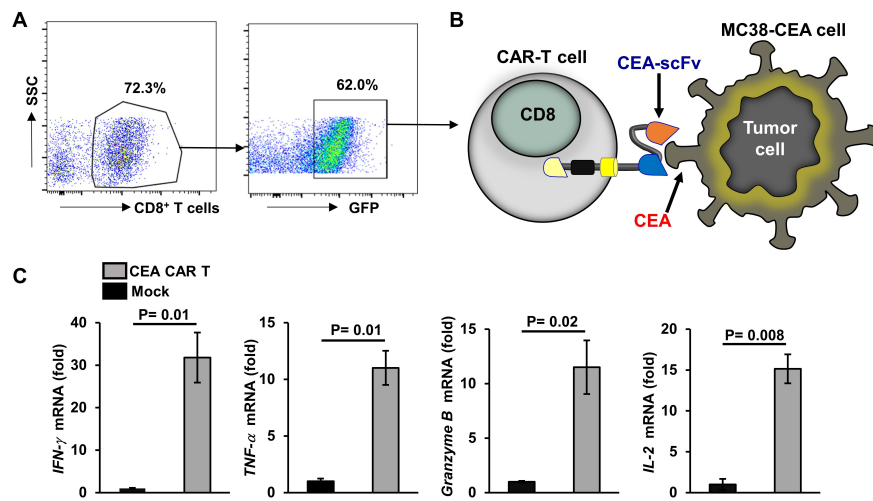

Supplementary Figure 2

Supplement: jitc-2020-001688supp002_data_supplement.pdf [file jitc-2020-001688supp002_data_supplement.pdf]
